# Supplementary material for: Pemafibrate, a novel selective peroxisome proliferator-activated receptor alpha modulator, improves the pathogenesis in a rodent model of nonalcoholic steatohepatitis
Source: PubMed Central journal article supplement (PMC5307366; doi:10.1038/srep42477), 2017-02-14
Supplement: srep42477-s1.pdf [file srep42477-s1.pdf]

1 **Supplementary information**

2

3 **Pemafibrate, a novel selective peroxisome proliferator-activated receptor alpha**  
4 **modulator, improves the pathogenesis in a rodent model of nonalcoholic**  
5 **steatohepatitis**

6

7 Yasushi Honda<sup>1</sup>, Takaomi Kessoku<sup>1</sup>, Yuji Ogawa<sup>1</sup>, Wataru Tomeno<sup>1</sup>, Kento Imajo<sup>1</sup>, Koji  
8 Fujita<sup>1</sup>, Masato Yoneda<sup>1</sup>, Toshiaki Takizawa<sup>2</sup>, Satoru Saito<sup>1</sup>, Yoji Nagashima<sup>3</sup>, Atsushi  
9 Nakajima<sup>1\*</sup>

10

11 <sup>1</sup>Department of Gastroenterology and Hepatology, Yokohama City University Graduate  
12 School of Medicine, Yokohama, Japan

13 <sup>2</sup>Department of Pharmacology Research, Tokyo New Drug Research Laboratories,  
14 Kowa Co. Ltd., Tokyo, Japan

15 <sup>3</sup>Department of Surgical Pathology, Tokyo Women's Medical University, Tokyo, Japan

16

17 **\*Corresponding author:**

18 Atsushi Nakajima, MD, PhD

- 1 Department of Gastroenterology and Hepatology, Yokohama City University Graduate
- 2 School of Medicine, 3-9 Fukuura, Kanazawa-ku, Yokohama 236-0004, Japan
- 3 Telephone: +81-45-787-2640; Fax: +81-45-784-3546; E-mail: [nakajima-ty@umin.ac.jp](mailto:nakajima-ty@umin.ac.jp)

1

2 **Supplementary Table 1**3 **Characteristics of model mice (methionine choline-deficient (MCD)-fed db/db mice)**

| Parameter                 | BD (db/db)    | MCD (db/db)  | PEMA-L (db/db) | PEMA-H (db/db) |
|---------------------------|---------------|--------------|----------------|----------------|
| n                         | 8             | 8            | 8              | 8              |
| Body weight (g)           | 51.4 ± 3.4 †  | 43.0 ± 1.1   | 39.3 ± 1.4 *   | 34.6 ± 2.3 *   |
| Liver weight (g)          | 2.65 ± 0.37 † | 1.25 ± 0.17  | 1.37 ± 0.13    | 1.78 ± 0.12 *  |
| Total cholesterol (mg/dL) | 114.7 ± 8.7 † | 136.7 ± 15.7 | 147.5 ± 12.8   | 128.7 ± 15.6   |
| Triglycerides (mg/dL)     | 80.4 ± 41.8 † | 28.9 ± 5.6   | 21.2 ± 2.5 *   | 15.9 ± 3.5 *   |
| AST (IU/L)                | 74.8 ± 12.4 † | 87.5 ± 6.5   | 60.9 ± 4.7 *   | 48.8 ± 8.1 *   |
| ALT (IU/L)                | 90.8 ± 16.8   | 96.7 ± 25.8  | 61.4 ± 12.3    | 45.4 ± 13.7    |
| NAS                       | 1.6 ± 1.1 †   | 4.9 ± 1.0    | 2.3 ± 1.5      | 0.9 ± 1.0 *    |
| Steatosis                 | 0.5 ± 0.5 †   | 2.4 ± 0.7    | 1.3 ± 0.7      | 0.5 ± 0.5 *    |
| Lobular inflammation      | 0.0 ± 0.0     | 0.6 ± 0.7    | 0.4 ± 0.5      | 0.0 ± 0.0 *    |

|                       |             |           |           |           |
|-----------------------|-------------|-----------|-----------|-----------|
| Hepatocyte ballooning | 1.1 ± 0.6 † | 1.9 ± 0.4 | 0.6 ± 0.9 | 0.4 ± 0.5 |
|-----------------------|-------------|-----------|-----------|-----------|

- 1 AST, aspartate aminotransferase; ALT, alanine aminotransferase; NAS, nonalcoholic fatty liver disease activity score.
- 2 NAS was scored according to the method described by Kleiner *et al.*<sup>46</sup>, as outlined in Supplementary Table 2. Data are the mean ± SE.
- 3 Significance was determined using Student's *t*-test (†*p* < 0.05 *versus* MCD (db/db) mice) or Dunnett's test (\**p* < 0.05 *versus* MCD (db/db)
- 4 mice).

1 **Supplementary Table 2**2 **Scoring system and fibrosis stage****NAFLD Activity Score**

| Item                     | Definition                                               | Grade |
|--------------------------|----------------------------------------------------------|-------|
| Steatosis                | <5%                                                      | 0     |
|                          | 5–33%                                                    | 1     |
|                          | 33–66%                                                   | 2     |
|                          | >66%                                                     | 3     |
| Lobular<br>inflammation  | None                                                     | 0     |
|                          | <2 foci/field                                            | 1     |
|                          | 2–4 foci/field                                           | 2     |
|                          | >5 foci/field                                            | 3     |
| Hepatocyte<br>ballooning | None                                                     | 0     |
|                          | Few ballooned cells                                      | 1     |
|                          | Many ballooned cells                                     | 2     |
| <b>Fibrosis stage</b>    |                                                          |       |
| Item                     | Definition                                               | Stage |
| Fibrosis stage           | Isolated perisinusoidal or portal/periportal<br>fibrosis | 1     |
|                          | Perisinusoidal and portal/periportal fibrosis            | 2     |
|                          | Bridging fibrosis                                        | 3     |
|                          | Cirrhosis                                                | 4     |

3 **Items, definitions, grades, and stages used in this study**

1 **Supplementary Figure 1**

2 **Pemafibrate tended to increase serum and mRNA levels of fibroblast growth factor**

3 **21 (FGF21)**

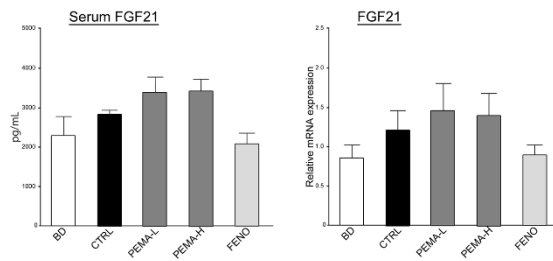

4

5 Serum levels and mRNA expression of FGF21 in BD, CTRL, PEMA-L, PEMA-H, and

6 FENO mice (n=5–10). Results are the mean  $\pm$  SE. Significance was determined using

7 Student's *t*-test ( $\dagger p < 0.05$  versus CTRL mice) or Dunnett's test ( $*p < 0.05$  versus CTRL

8 mice).

1 **Supplementary Figure 2**2 **Mechanism detailing the effect of pemafibrate on a rodent model of NASH**3 **(schematic)**NASH model mice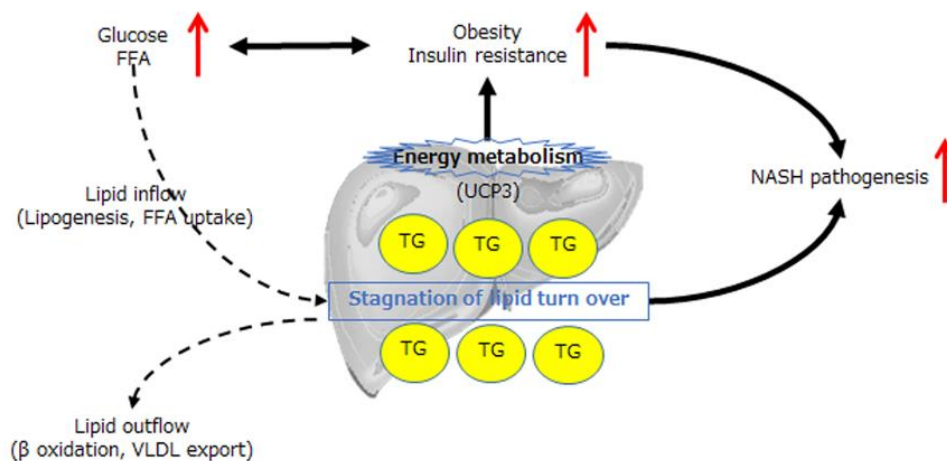Administration of pemafibrate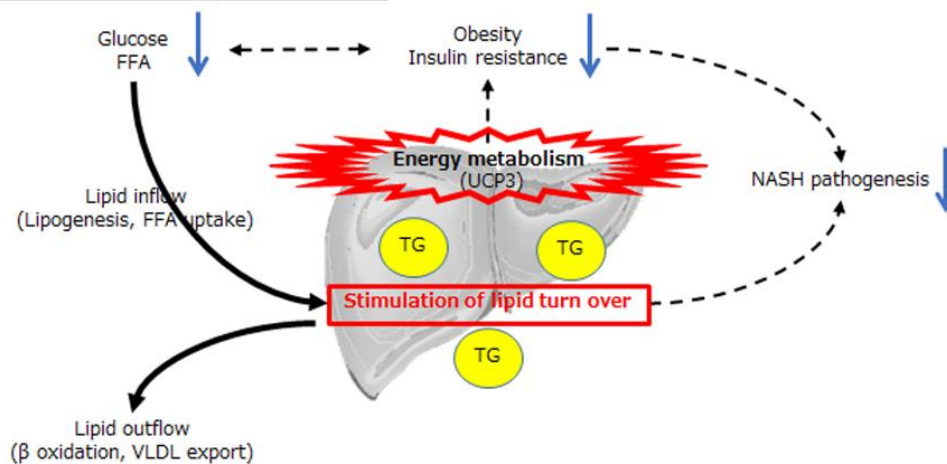

4

5 NASH, nonalcoholic steatohepatitis; FFA, free fatty acid; TG, triglyceride; VLDL, very-

6 low-density lipoprotein; UCP3, uncoupling protein 3

1 **Supplementary Figure 3**2 **Experimental protocol**

A

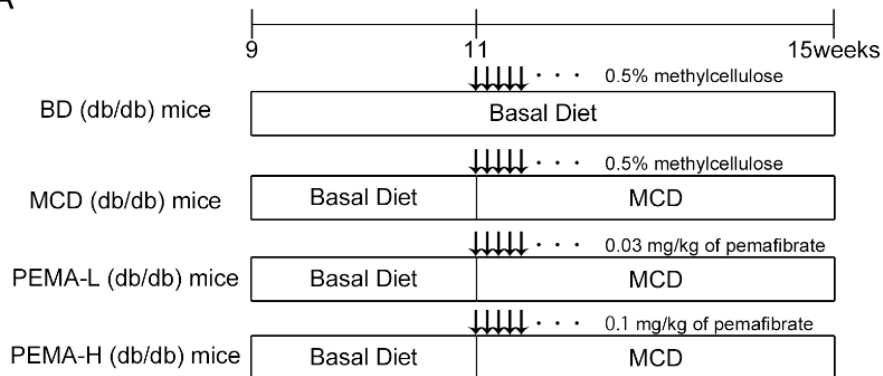

B

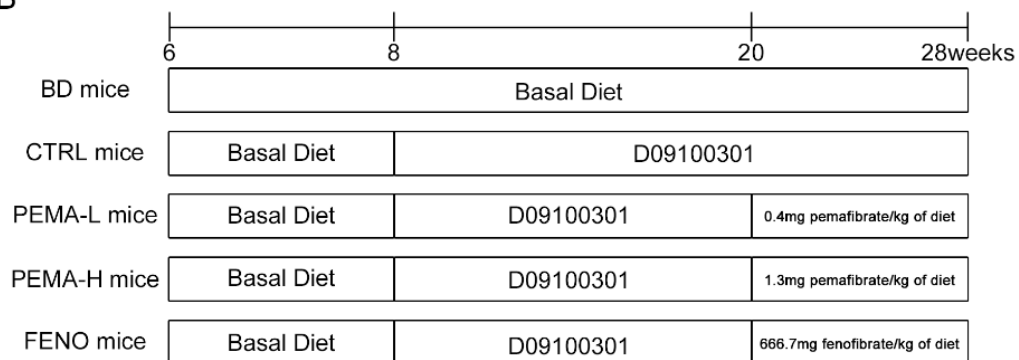

3
